# Supplementary material
Source: PubMed Central journal article supplement (PMC4483584)
Supplement: ASN.2014040399_ASN2014040399SupplementaryData.pdf [file ASN.2014040399_ASN2014040399SupplementaryData.pdf]

## **SUPPLEMENTARY MATERIAL**

### **Data collection procedures**

The transplant allocation system was identical between the 2 centers, corresponding to the rules of the French National Agency for Organ Procurement (Agence de la Biomédecine). All of the data from Necker Hospital regarding the donors and recipients were extracted from the DIVAT clinical prospective cohort (official Web site: [www.divat.fr](http://www.divat.fr)). Data from the Saint Louis Hospitals were obtained from the French national registry agency database CRISTAL (official Web site: <https://www.sipg.sante.fr/portail/>). The DIVAT and CRISTAL database networks were approved by the National French Commission for bioinformatics data and patient liberty (DIVAT: CNIL, registration number: 1016618, validated June 8, 2004; and CRISTAL: CNIL, registration number: 363505, validated April 3, 1996). Codes were used to ensure strict donor and recipient anonymity and blinded assays. Informed consent was obtained from the participants at the time of transplantation. The data were inputted into the databases in real time, as well as at each transplant anniversary, and they were submitted for annual audits.

### **Per protocol screening biopsy**

All of the graft biopsies were scored and graded from 0 - 3 by trained pathologists (JPDVH, DN, JV, MR), according to the updated Banff criteria, (6, 34) based on the following histological factors: glomerular inflammation (glomerulitis), tubulitis, interstitial inflammation, endarteritis, peritubular capillary inflammation (capillaritis), transplant glomerulopathy, interstitial fibrosis, tubular atrophy, and arteriosclerosis. The microcirculation inflammation score was defined as the sum of glomerular and peritubular capillary inflammation, and the tubular and interstitial score was the sum of interstitial inflammation and tubulitis.

## **Post-transplantation induction protocols and maintenance immunosuppressive therapy**

All of the patients received induction therapy, consisting of rabbit antithymocyte globulin (1.5 mg/kg/day for 10 days) or basiliximab (20 mg at day 0 and day 4), immediately after transplantation. Subsequent maintenance immunosuppressive therapy consisted of prednisone; mycophenolate mofetil (1000 mg twice daily); tacrolimus, administered to maintain a target blood level of 8 - 10 ng/mL for the first 3 months and 6 - 8 ng/mL after 3 months; or cyclosporine, administered to maintain a target blood level of 800 - 1200 ng/mL for the first 3 months and 600 - 800 ng/mL after 3 months. Patients with preexisting donor-specific anti-HLA antibodies, as detected by the techniques in current use at the time of transplantation, received intravenous immune globulin (2 g/kg of body weight on day 0, day 20, and day 40) with or without rituximab given twice (375 mg/m<sup>2</sup> of body-surface area on day 0 and day 7) as prophylaxis against acute rejection, according to center practice (26, 35, 36).

## **Treatment of allograft-rejection episodes**

Of the 142 patients with subclinical antibody-mediated rejection, 56 received antibody-targeting therapies consisting of 4 courses of high-dose intravenous immune globulin (2 g/kg of body weight over 96 hours), plasma exchange (5 rounds), and anti-CD-20 Rituximab® at a dose of 375 mg/m<sup>2</sup> of body surface, based on the biopsy results. The remaining 86 patients with subclinical antibody-mediated rejection did not receive antibody-targeting-based therapy following biopsy (25 received methylprednisolone pulses alone, and 61 did not receive any treatment based on the biopsy findings). Among the 56 (39.4%) patients with subclinical ABMR who received antibody-directed therapy, 8 lost their grafts (14.29%). Among the remaining 86 (60.5%) patients with subclinical ABMR who did not receive antibody-directed therapy, 21 (24.42%) lost their grafts (p=0.14, compared with subclinical ABMR patients who received antibody-directed therapy).

### **Detection of antibodies against donor-specific HLA molecules**

We retrospectively determined the presence of circulating donor-specific anti-HLA antibodies at the time of biopsy in all patients with biopsy-proven acute rejection using single-antigen flow bead assays (One Lambda, Inc., Canoga Park, CA, USA) on a Luminex platform. All beads showing a normalized mean intensity of fluorescence greater than 500 were considered positive, as previously described (26). For each patient, we recorded the number, specificity, and mean intensity of fluorescence of all donor-specific anti-HLA antibodies also detected. The maximum mean intensity of fluorescence of donor-specific anti-HLA antibodies was defined as the highest-ranked donor-specific bead. HLA typing of transplant recipients was performed by molecular biology (Innolipa HLA typing kit; Innogenetics, Belgium). For all of the kidney transplant donors, HLA-A/B/DR/DQ tissue typing was performed using the microlymphocytotoxicity technique with One Lambda Inc. tissue-typing trays, and the typing was controlled by molecular biology technique.

### **Independent validation cohort**

The external validation cohort consisted of 321 kidney recipients transplanted at Saint Louis Hospital, Paris, France, between January 2006 and January 2010. This time period corresponds to the time since Saint Louis implemented a policy of protocol biopsy at 1-year post-transplant. Therefore, for the survival analysis in the validation group, we used a maximum follow-up of 7 years post-transplant. Similar immunological rules for kidney transplantation were applied, with all of the transplantations being ABO-compatible and negative current IgG T-cell and B-cell complement-dependent cytotoxicity cross-matching required for all of the patients. Data were retrieved on December 19, 2012, and their use was based on an agreement between centers participating in the national database system (Agence de la Biomédecine).

## **SUPPLEMENTARY FIGURES AND TABLES**

**Supplementary Figure 1:** Graft survival by rejection profile in the external validation cohort (n=321)

**Supplementary Figure 2:** Risk of graft loss according to kidney allograft function and subclinical ABMR phenotype in the external validation cohort

**Supplementary Table 1:** Comparison of baseline characteristics between kidney allograft recipients included and excluded from the study

**Supplementary Table 2:** Histopathological lesions found in for-cause biopsies taken after 1 year post-transplant

**Supplementary Table 3:** Sensitivity analysis of acute rejection based on a multivariate analysis of factors associated with kidney graft loss adjusted for acute rejection

**Supplementary Table 4:** Baseline characteristics of the external validation cohort

**Supplementary Table 5:** Multivariate analysis of factors associated with kidney graft loss in the external validation cohort

**Supplementary Figure 1: Graft survival by rejection profile in the external validation cohort (n=321)**

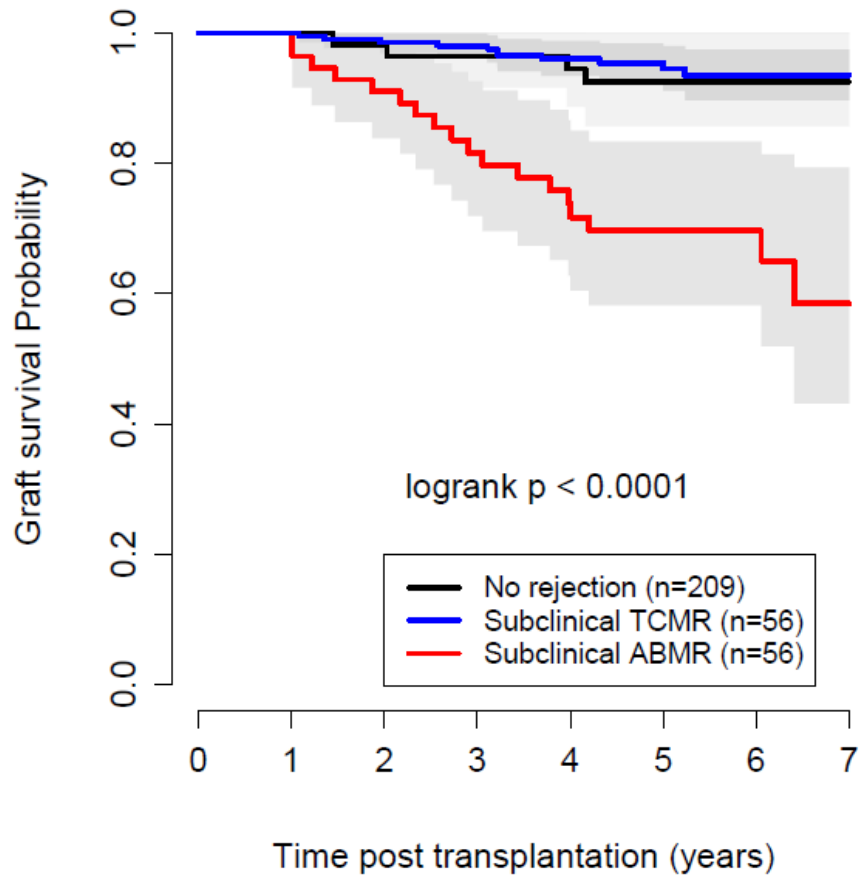

|                    |     |     |     |     |     |     |    |    |
|--------------------|-----|-----|-----|-----|-----|-----|----|----|
| — Subclinical TCMR | 56  | 56  | 55  | 53  | 50  | 36  | 22 | 11 |
| — Subclinical ABMR | 56  | 56  | 51  | 42  | 36  | 20  | 16 | 3  |
| — No rejection     | 209 | 209 | 203 | 198 | 180 | 105 | 49 | 11 |

**Supplementary Figure 2: Risk of graft loss according to kidney allograft function and subclinical ABMR phenotype in the external validation cohort (n=321)**

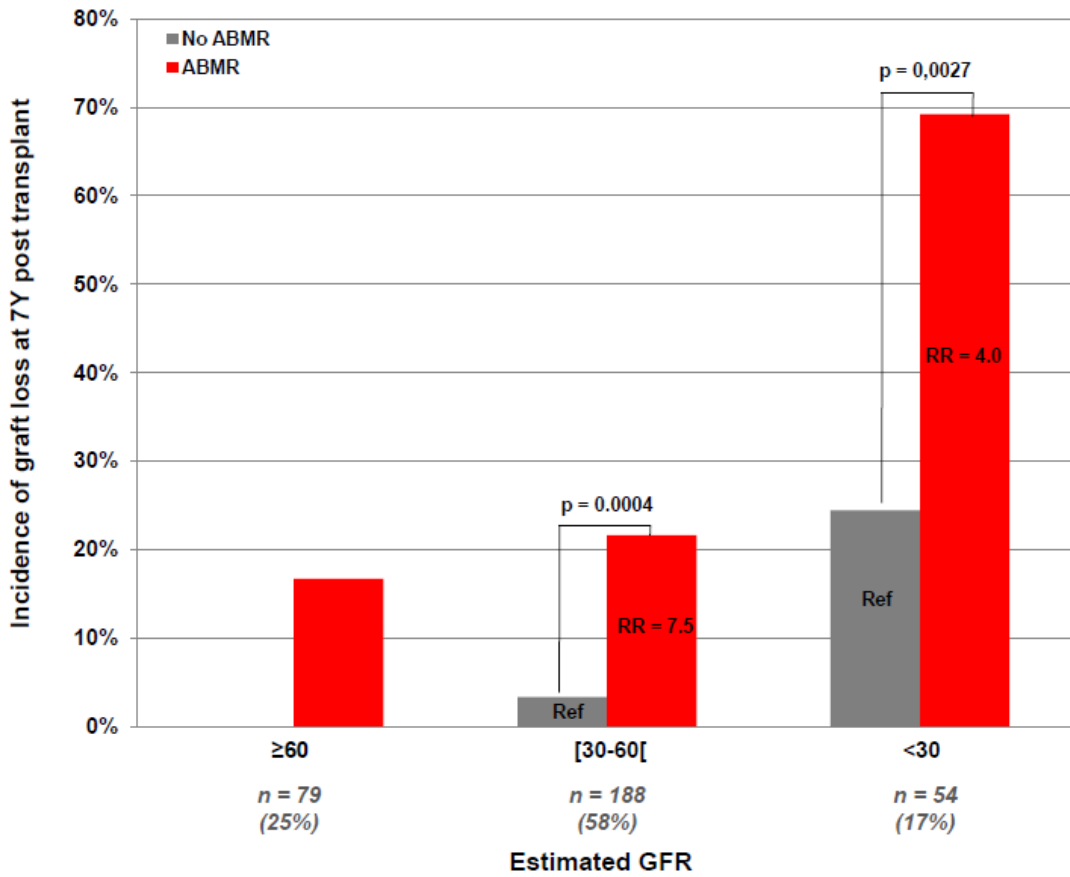

**Footnotes:**

RR: Relative risk

GFR: Glomerular filtration rate estimated by the MDRD formula

95 % CI of the RR are 7.5 (2.5 - 23.1); 4.0 (1.6 - 9.9)

**Supplementary Table 1: Comparison of baseline characteristics between kidney allograft recipients included and excluded from the study**

| Patient Characteristics                          | Included<br>(N = 1001) |                | Excluded<br>(N = 306) |                    | p          |
|--------------------------------------------------|------------------------|----------------|-----------------------|--------------------|------------|
|                                                  | n                      |                | n                     |                    |            |
| Recipient age — years **                         | 1001                   | 47.9 ± 13      | 306                   | 49.2 ± 14          | p = 0.1399 |
| Recipient male gender (n,%)                      | 994                    | 582 (59%)      | 305                   | 174 (57%)          | p = 0.6429 |
| Re-transplantation (n,%)                         | 1001                   | 190 (19%)      | 306                   | 25 (8%)            | p < 0.0001 |
| Time since dialysis — months **                  | 866                    | 5.04 ± 4.4     | 263                   | 4.8 ± 4.1          | p = 0.5405 |
| Donor age (years) **                             | 991                    | 50 ± 16        | 271                   | 52.6 ± 17          | p = 0.0577 |
| Donor male gender (n,%)                          | 979                    | 553 (56%)      | 269                   | 128 (47.6%)        | p = 0.0105 |
| Deceased donor (n,%)                             | 1001                   | 819 (82%)      | 306                   | 265 (87%)          | p = 0.0560 |
| Cardiovascular cause of donor death (n,%)        | 1001                   | 446 (45%)      | 306                   | 140 (46%)          | p = 0.7427 |
| Cold ischemia time (hours)                       | 970                    | 19 ± 10        | 244                   | 20.4 ± 11          | p = 0.0168 |
| Delayed graft function (n, %)                    | 995                    | 219 (22%)      | 248                   | 70 (28%)           | p = 0.0436 |
| Graft survival (n, %) <sup>§</sup>               | 1001                   | 865 (86%)      | 306                   | 189 (62%)          | p < 0.0001 |
| Patient survival (n, %) <sup>§</sup>             | 1001                   | 928 (93%)      | 306                   | 255 (83%)          | p < 0.0001 |
| Follow-up (years)                                | 1001                   | 4.9 ± 2.4      | 306                   | 2.9 ± 3.1          | p < 0.0001 |
| Causal nephropathy (n,%)                         | 1001                   |                | 306                   |                    |            |
| Diabetes                                         |                        | 85 (8.5%)      |                       | 40 (13.1%)         |            |
| Vascular                                         |                        | 68 (6.8%)      |                       | 25 (8.2%)          |            |
| Glomerulopathy                                   |                        | 316 (31.6%)    |                       | 72 (23.5%)         |            |
| Congenital                                       |                        | 205 (20.4%)    |                       | 57 (18.6%)         |            |
| Other                                            |                        | 7 (0.7%)       |                       | 2 (0.6%)           |            |
| Interstitial nephropathy                         |                        | 123 (12.3%)    |                       | 32 (10.5%)         |            |
| Undetermined                                     |                        | 197 (19.7%)    |                       | 78 (25.5%)         | p = 0.0155 |
| Immunology                                       |                        |                |                       |                    |            |
| HLA A+B mismatch **                              | 986                    | 2 ± 1.1        | 271                   | 2 ± 1.1            | p = 0.1599 |
| HLA DR mismatch **                               | 987                    | 0.8 ± 0.7      | 270                   | 0.8 ± 0.7          | p = 0.5312 |
| Recipient blood group type A/B/O/AB              | 968                    | 438/75/425/30  | 252                   | 102/25/110/15      | p = 0.6345 |
| Number of dialysis treatments post-transplant ** | 987                    | 1 ± 2.4 (0-29) | 247                   | 2.6 ± 10.3 (0-150) | p = 0.0156 |

The data are from the DIVAT database (Données Informatiques Validées en Transplantation) (24). All of the p values were determined by chi-square tests for the comparison of proportions and by unpaired t tests for the comparison of continuous variables.

\*\* Plus-minus values are means ± SDs.

§ Last follow-up: April 15, 2012

**Supplementary Table 2A:** Histopathological lesions found in for-cause biopsies taken before 1 year post-transplant<sup>§</sup> (536 biopsies in 396 patients)

|                                                                                 | <b>No Rejection</b> | <b>Subclinical TCMR</b> | <b>Subclinical ABMR</b> |
|---------------------------------------------------------------------------------|---------------------|-------------------------|-------------------------|
| <b>Number of biopsies for cause performed before 1 year (n,%)</b>               | 323 (60%)           | 79 (15%)                | 134 (25%)               |
| <b>Mean time since 1-year screening biopsy (days)</b>                           | - 275 ± 117         | - 242 ± 113             | - 281 ± 110             |
| <b>Number of patients with a biopsy for cause performed before 1 year (n,%)</b> | 249 (34%)           | 60 (45%)                | 87 (61%)                |
| <b>Microcirculation inflammation (g+ptc) Banff score*</b>                       | 0.9 ± 1.5           | 0.9 ± 1.5               | 2.6 ± 2.2               |
| <b>Interstitial inflammation (i) Banff score*</b>                               | 0.6 ± 0.9           | 0.9 ± 1.1               | 0.8 ± 1.1               |
| <b>Tubulitis (t) Banff score*</b>                                               | 0.7 ± 1.1           | 1.1 ± 1.2               | 0.9 ± 1.2               |
| <b>Transplant glomerulopathy (cg) Banff score*</b>                              | 0.1 ± 0.4           | 0.0 ± 0.2               | 0.2 ± 0.6               |
| <b>Fibrosis-atrophy (IFTA) Banff score*</b>                                     | 0.7 ± 1.0           | 1.1 ± 1.0               | 0.8 ± 1.0               |
| <b>Arteriosclerosis (cv) Banff score*</b>                                       | 1.2 ± 1.0           | 1.2 ± 1.0               | 1.1 ± 1.0               |
| <b>TCMR diagnosis (n,%)</b>                                                     | 43 (13%)            | 22 (28%)                | 17 (13%)                |
| <b>ABMR diagnosis (n,%)</b>                                                     | 49 (15%)            | 7(8%)                   | 73 (54%)                |
| <b>Other diagnoses (AKI, borderline, BK, CNI toxicity, recurrence)</b>          | 231 (72%)           | 50 (63%)                | 44 (33%)                |

§ Note that this table is purely descriptive and illustrative given the different time points at which the biopsies for cause were performed before 1 year post-transplant.

\*The Banff scores are given as the mean ± SEM



**Supplementary Table 2B:** Histopathological lesions found in biopsies for cause taken after 1 year post-transplant<sup>€</sup> (317 biopsies in 238 patients)

|                                                                          | No Rejection     | Subclinical TCMR | Subclinical ABMR |
|--------------------------------------------------------------------------|------------------|------------------|------------------|
| Biopsy for cause performed after 1-year (n,%)                            | 210 (66%)        | 51 (16%)         | 56 (18%)         |
| Mean time since 1-year screening biopsy ( <i>days</i> )                  | 679.1 ± 580      | 804 ± 659        | 467 ± 511        |
| Number of patients with a biopsy for cause performed before 1 year (n,%) | <b>249 (34%)</b> | <b>38 (29%)</b>  | <b>46 (32%)</b>  |
| Microcirculation inflammation (g+ptc) Banff score*                       | 1.2 ± 1.7        | 1.3 ± 1.7        | 2.6 ± 1.9        |
| Interstitial inflammation (i) Banff score*                               | 0.5 ± 0.9        | 0.4 ± 0.8        | 0.4 ± 0.9        |
| Tubulitis (t) Banff score*                                               | 0.5 ± 1.0        | 0.4 ± 0.8        | 0.3 ± 0.7        |
| Transplant glomerulopathy (cg) Banff score*                              | 0.2 ± 0.8        | 0.3 ± 0.9        | 1.0 ± 1.3        |
| Fibrosis-atrophy (IFTA) Banff score*                                     | 1.7 ± 1.1        | 1.6 ± 1.1        | 1.5 ± 1.2        |
| Arteriosclerosis (cv) Banff score*                                       | 1.4 ± 1.0        | 1.4 ± 1.1        | 1.6 ± 1.1        |
| TCMR diagnosis                                                           | 27 (13.0%)       | 5 (9.8%)         | 1 (1.8%)         |
| ABMR diagnosis <sup>£</sup>                                              | 55 (26.4%)       | 15 (29.4%)       | 39 (69.6%)       |

€ Note that this table is purely descriptive and illustrative given the different time points at which the biopsies for cause were performed after 1 year post-transplant.

\*The Banff scores are given as the mean ± SEM

£ Acute ABMR or chronic active ABMR

**Supplementary Table 3: Sensitivity analysis of acute rejection based on a multivariate analysis of factors associated with kidney graft loss adjusted for acute rejection<sup>\$</sup>**

|                                         |                | Number of patients | Number of events | HR     | 95% CI          | P       |
|-----------------------------------------|----------------|--------------------|------------------|--------|-----------------|---------|
| eGFR* at 1 year                         | eGFR ≥ 60      | 305                | 6                | 1      | -               | -       |
|                                         | 30 ≤ eGFR < 60 | 577                | 38               | 2.824  | [1.186- 6.723]  | -       |
|                                         | eGFR < 30      | 79                 | 28               | 11.541 | [4.577- 29.101] | <0.0001 |
| Subclinical ABMR at 1 year <sup>€</sup> | No             | 825                | 45               | 1      | -               | -       |
|                                         | Yes            | 136                | 27               | 2.723  | [1.578 - 4.697] | 0.0003  |
| Previous acute TCMR                     | No             | 880                | 64               | 1      |                 |         |
|                                         | Yes            | 81                 | 8                | 0.897  | [0.421- 1.909]  | 0.7773  |
| Previous acute ABMR                     | No             | 839                | 56               | 1      |                 |         |
|                                         | Yes            | 122                | 16               | 1.368  | [0.725 -2.580]  | 0.3335  |
| Proteinuria at 1 year (log10 value)     |                | 961                | 72               | 1.489  | [1.248-1.776]   | <0.0001 |

Footnotes:

HR: hazard ratio

CI: confidence interval

\* GFR: glomerular filtration rate estimated by the MDRD formula

<sup>\$</sup> Final multivariate Cox model obtained by entering risk factors from the univariate model reaching  $p \leq 0.10$  as the threshold in a single multivariate proportional hazards model. The final multivariate model is adjusted on the following parameters: i) donor age, ii) donor type, iii) cold ischemia time, iv) graft rank, v) delayed graft function vi) atrophy scarring vii) C4d graft deposition and viii) previous rejection episodes.

<sup>€</sup> Note that subclinical ABMR includes the presence of circulating donor-specific anti-HLA antibodies (DSA) plus microcirculation inflammation lesions (glomerulitis plus peritubular capillaritis). The modeling was performed in 961 patients due to missing data on proteinuria.

**Supplementary Table 4: Baseline characteristics of the external validation cohort**

\*\* mean ± SD

| Patient Characteristics                       | Study      |               | External Validation |               | P        |
|-----------------------------------------------|------------|---------------|---------------------|---------------|----------|
|                                               | Population |               | Population          |               |          |
|                                               | N          | (N = 1001)    | N                   | (N = 321)     |          |
| Recipient age — years **                      | 1001       | 47.9 ± 13     | 321                 | 46.2 ± 13.2   | 0.042    |
| Recipient gender (male) (n,%)                 | 994        | 582 (59%)     | 321                 | 187 (58%)     | 0.9481   |
| Re-transplantation (n,%)                      | 1001       | 190 (19%)     | 321                 | 32 (10%)      | 0.0001   |
| Time since dialysis — months **               | 866        | 5.04 ± 4.4    | 277                 | 5.3 ± 5.1     | 0.411    |
| Donor age (years) **                          | 991        | 50 ± 16       | 321                 | 47.8 ± 16     | 0.032    |
| Donor gender (male) (n,%)                     | 979        | 553 (56%)     | 321                 | 179 (55.8%)   | 0.8459   |
| Deceased donor (n,%)                          | 1001       | 819 (82%)     | 321                 | 282 (87.9%)   | 0.01249  |
| Cardiovascular cause of donor death (n,%)     | 1001       | 446 (45%)     | -                   | -             | -        |
| Cold ischemia time (hours)                    | 970        | 19 ± 10       | 321                 | 15.1 ± 7.5    | <0.0001  |
| Delayed graft function (n, %)                 | 995        | 219 (22%)     | -                   | -             | -        |
| Graft survival (n, %)                         | 1001       | 865 (86%)     | 321                 | 288 (90%)     | 0.1492   |
| Patient survival (n, %)                       | 1001       | 928 (93%)     | 321                 | 311 (97%)     | 0.003828 |
| Follow-up (years)                             | 1001       | 4.7 ± 2.1     | 321                 | 4.4 ± 1.4     | 0.06783  |
| Causal nephropathy (n, %)                     | 1001       |               | 321                 |               |          |
| Diabetes                                      |            | 85 (8.5%)     |                     | 56 (17.4%)    |          |
| Vascular                                      |            | 68 (6.8%)     |                     | 40 (12.4%)    |          |
| Glomerulopathy                                |            | 316 (31.6%)   |                     | 67 (20.9%)    |          |
| Congenital                                    |            | 205 (20.4%)   |                     | 25 (7.8%)     |          |
| Other                                         |            | 7 (0.7%)      |                     | 41 (12.8%)    |          |
| Interstitial nephropathy                      |            | 123 (12.3%)   |                     | 31 (9.7%)     |          |
| Undetermined                                  |            | 197 (19.7%)   |                     | 61 (19.0%)    | <0.0001  |
| Immunology                                    |            |               |                     |               |          |
| HLA A/B/DR mismatch                           | 968        | 2.9 ± 0.9     | 321                 | 4 ± 1.4       | <0.001   |
| Recipient blood group type A/B/O/AB           | 968        | 438/75/425/30 | 321                 | 136/40/128/17 | 0.01627  |
| Number of dialysis treatments post-transplant | 987        | 1.0 ± 2.4     | -                   | -             | -        |

**Supplementary Table 5: Multivariate analysis of factors associated with kidney graft loss in the external validation cohort (N=321)**

|                         |                                          | Number<br>of<br>patients | Number<br>of<br>events | HR   | 95% CI        | P                 |
|-------------------------|------------------------------------------|--------------------------|------------------------|------|---------------|-------------------|
| <b>eGFR* at 1 year</b>  | <b>eGFR <math>\geq</math> 60</b>         | 79                       | 1                      | 1    | -             | -                 |
|                         | <b>30 <math>\leq</math> eGFR &lt; 60</b> | 188                      | 13                     | 4.0  | (0.5 - 30.9)  | -                 |
|                         | <b>eGFR &lt; 30</b>                      | 54                       | 19                     | 27.5 | (3.7 - 206.8) | <b>&lt;0.0001</b> |
| <b>Subclinical ABMR</b> | <b>No</b>                                | 265                      | 15                     | 1    | -             | -                 |
|                         | <b>Yes</b>                               | 56                       | 18                     | 5.7  | (2.9 - 11.4)  | <b>&lt;0.0001</b> |

Footnotes:

HR: Hazard ratio

CI: Confidence interval

eGFR: Glomerular filtration rate estimated by the MDRD formula
